# Supplementary material for: Therapeutic Implications for Intrinsic Phenotype Classification of Metastatic Castration-Resistant Prostate Cancer
Source: PubMed Central journal article supplement — Clin Cancer Res. 2022 May 12;28(14):3127–40. doi: 10.1158/1078-0432.CCR-21-4289 (PMC9365375; doi:10.1158/1078-0432.ccr-21-4289), 2022-05-12
Supplement: ccr-21-4289_supplementary_figure_s2_supps2.pdf [file ccr-21-4289_supplementary_figure_s2_supps2.pdf]

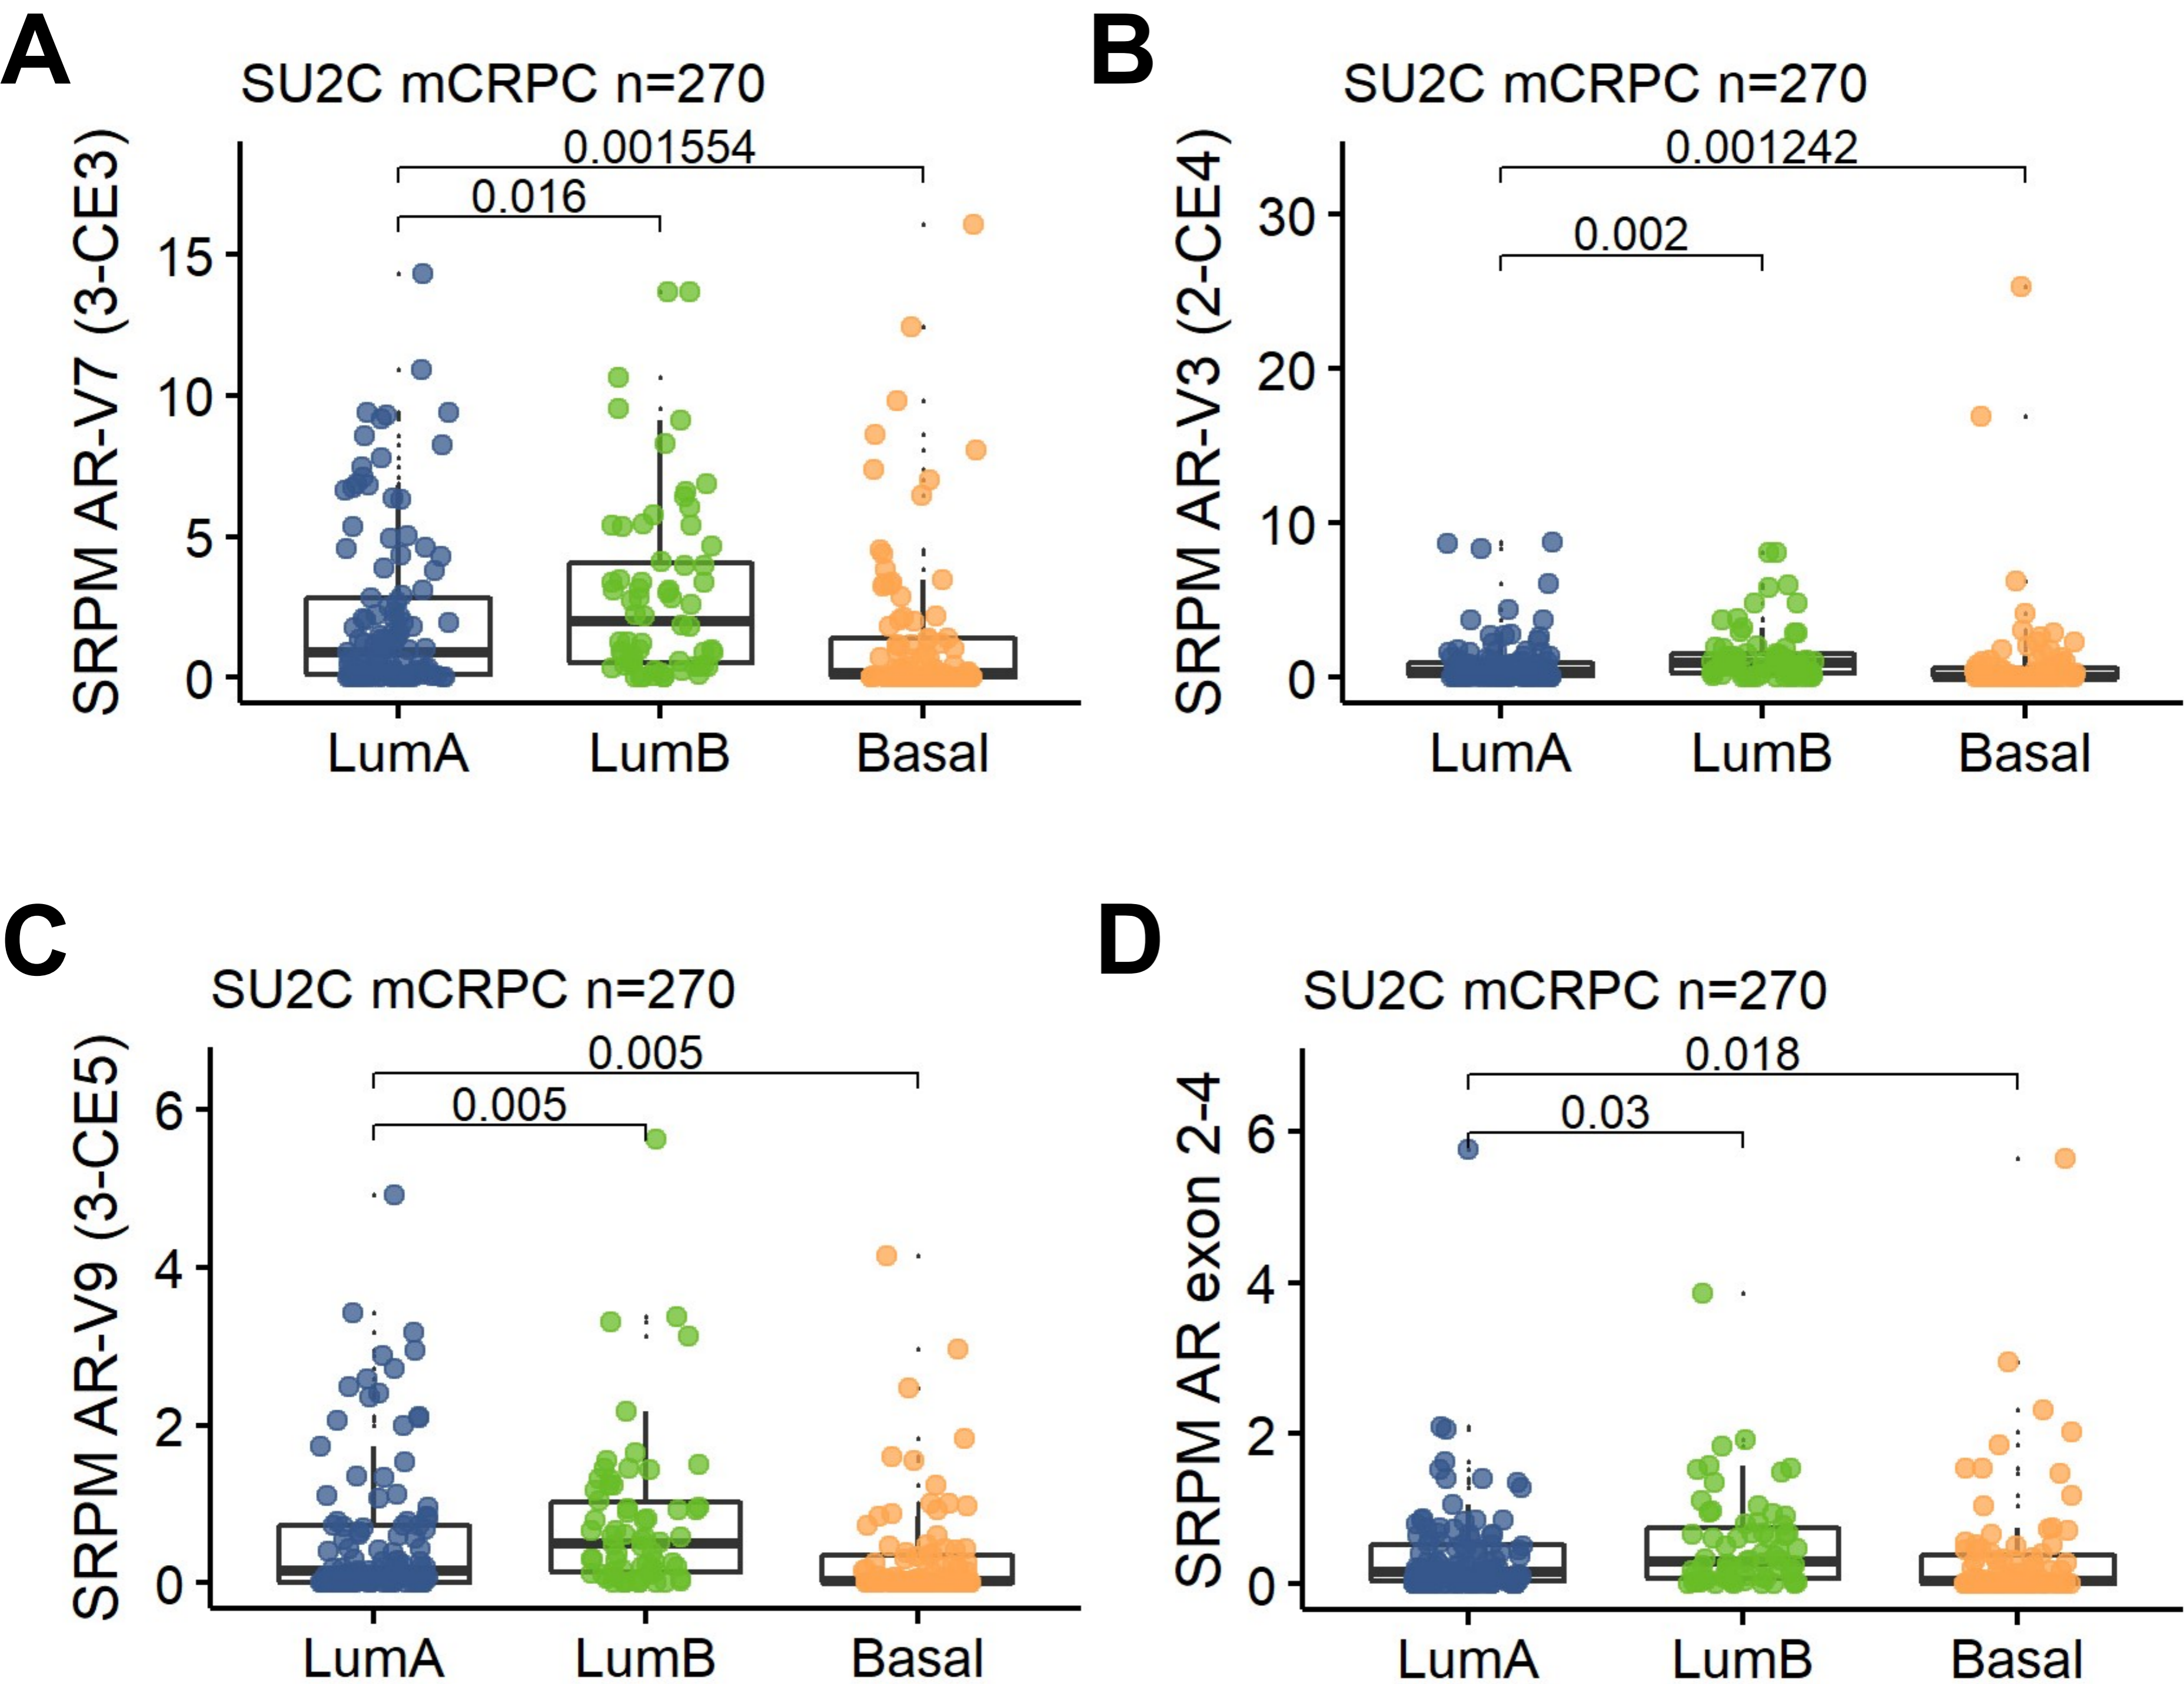

**Supplemental Figure 2. PAM50 classification of metastatic prostate cancer associates with *AR* splice variant expression.** PAM50 subtypes associate with *AR* splice variant levels (A) AR-V7 (exon 3-CE3), (B) AR-V3 (exon 2-CE4), (C) AR-V9 (exon 3-CE5) and (D) AR exon 2-exon 4, measured by RNA-seq and expressed as SRPM (spliced reads per million). Groups compared by Wilcoxon-rank tests with BH adjusted p-values shown on plots.
